# Supplementary material for: ThedaCare Nutrition Risk Screen Improves the Identification of Non–Intensive Care Unit Patients at Risk for Malnutrition Compared With the Nutrition Risk Screen 2002
Source: PubMed Central journal article supplement — JPEN J Parenter Enteral Nutr. 2018 Jun 30;43(1):70–80. doi: 10.1002/jpen.1315 (PMC7379985; doi:10.1002/jpen.1315), 2018-06-30
Supplement: JPEN-43-70-s001.pdf [file JPEN-43-70-s001.pdf]

|                                  | <b>Calculation</b>                                           | <b>Description</b>                                                                                                                                                                                                                                                |
|----------------------------------|--------------------------------------------------------------|-------------------------------------------------------------------------------------------------------------------------------------------------------------------------------------------------------------------------------------------------------------------|
| <b>Sensitivity</b>               | True Positives /<br>(True Positives +<br>False Negatives)    | The proportion of screens that correctly identified the incidence of the presence of malnutrition (i.e. moderate- or high-risk for malnutrition, moderate or severe malnutrition).                                                                                |
| <b>Specificity</b>               | True Negatives /<br>(True Negatives<br>+ False Positives)    | The proportion of screens that correctly identified the absence of malnutrition (i.e. low-risk for malnutrition).                                                                                                                                                 |
| <b>Negative Predictive Value</b> | True Negatives /<br>(True Negatives<br>+ False<br>Negatives) | The proportion of nutrition risk screens that were accurate out of all of the patients that did not have malnutrition, which included patients that were low-risk for malnutrition as confirmed using the NFPA.                                                   |
| <b>Positive Predictive Value</b> | True Positives /<br>(True Positives +<br>False Positives)    | The proportion of nutrition risk screens that were accurate out of all of the patients that had malnutrition, which included patients that had moderate- or high-risk for malnutrition, moderate malnutrition or severe malnutrition as confirmed using the NFPA. |

| <b>Nutrition Risk Screen</b>                                      |                 |                              |                 |
|-------------------------------------------------------------------|-----------------|------------------------------|-----------------|
|                                                                   | Low-Risk, n     | Moderate- or<br>High-Risk, n | <b>Total, n</b> |
| <b>RDN<br/>Assessment/NFPA</b>                                    |                 |                              |                 |
| Low-risk, n                                                       | True Negatives  | False Positives              |                 |
| Moderate- or High-<br>Risk; Moderate or<br>Severe Malnutrition, n | False Negatives | True Positives               |                 |
| <b>Total, n</b>                                                   |                 |                              |                 |

**Supplemental Table 1.** Descriptions of the equations used to calculate sensitivity, specificity, negative predictive value, and positive predictive value.
